# Supplementary material for: Microarray Analysis For Expression Profiles of lncRNAs and circRNAs in Rat Liver after Brain-Dead Donor Liver Transplantation
Source: Hindawi journal article supplement (doi:10.1155/2019/5604843), 2019-11-07

## Supplementary Materials

**Supplementary Figure 1: EEG (A) and MAP (B) 6 hours after brain death.**

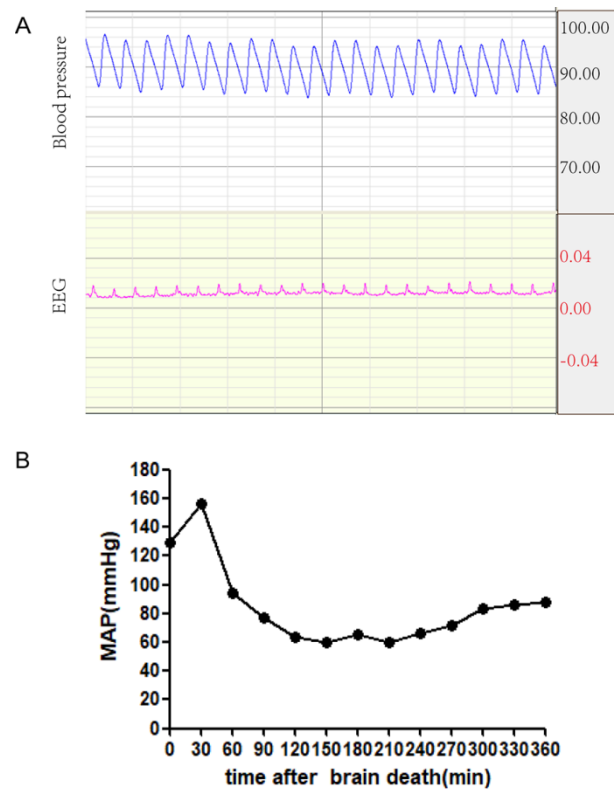

Supplement: f1 [file 5604843.f1.pdf]
